# Supplementary material for: Electrophoretic Deposition of Hydroxyapatite Film Containing Re-Doped MoS2 Nanoparticles
Source: PubMed Central journal article supplement (PMC5877518; doi:10.3390/ijms19030657), 2018-02-14
Supplement: ijms-19-00657-s001.pdf [file ijms-19-00657-s001.pdf]

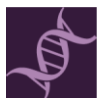

1 *Supporting Information*

2 **Electrophoretic deposition of hydroxyapatite film**  
3 **containing Re-doped MoS<sub>2</sub> nanoparticles**

4 **Hila Shalom, Yishay Feldman, Rita Rosentsveig, Iddo Pinkas, Ifat Kaplan-Ashiri,**  
5 **Alexey Moshkovich, Vladislav Perfilyev, Lev Rapoport and Reshef Tenne**

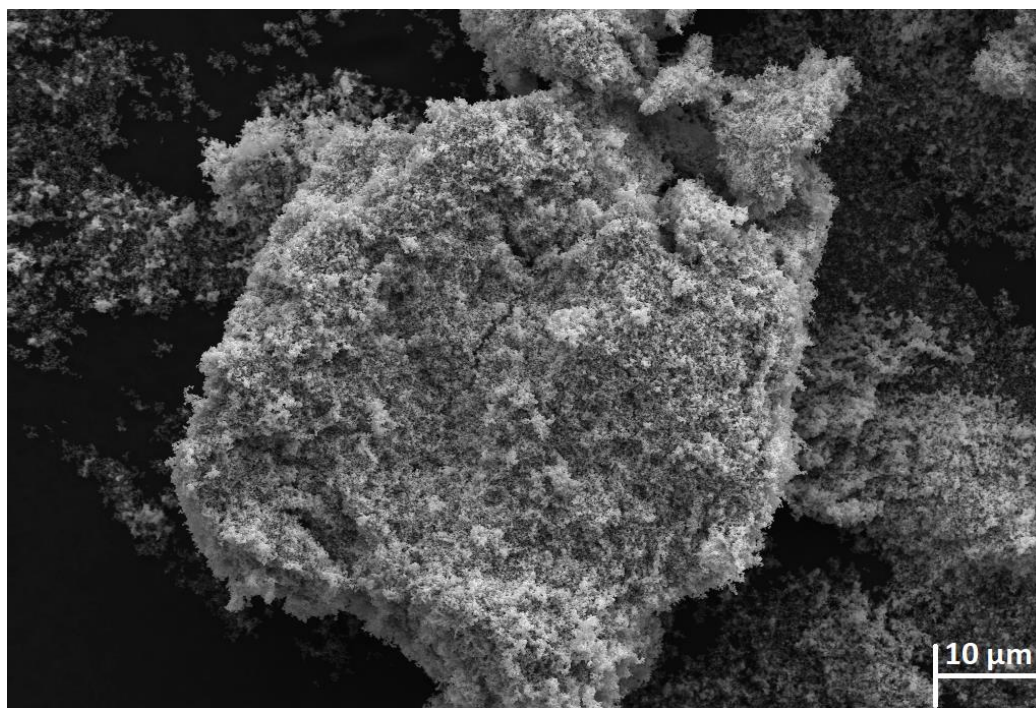

6

7

**Figure S1.** Typical SEM view of an agglomerate of Re:IF-MoS<sub>2</sub> nanoparticles.

8

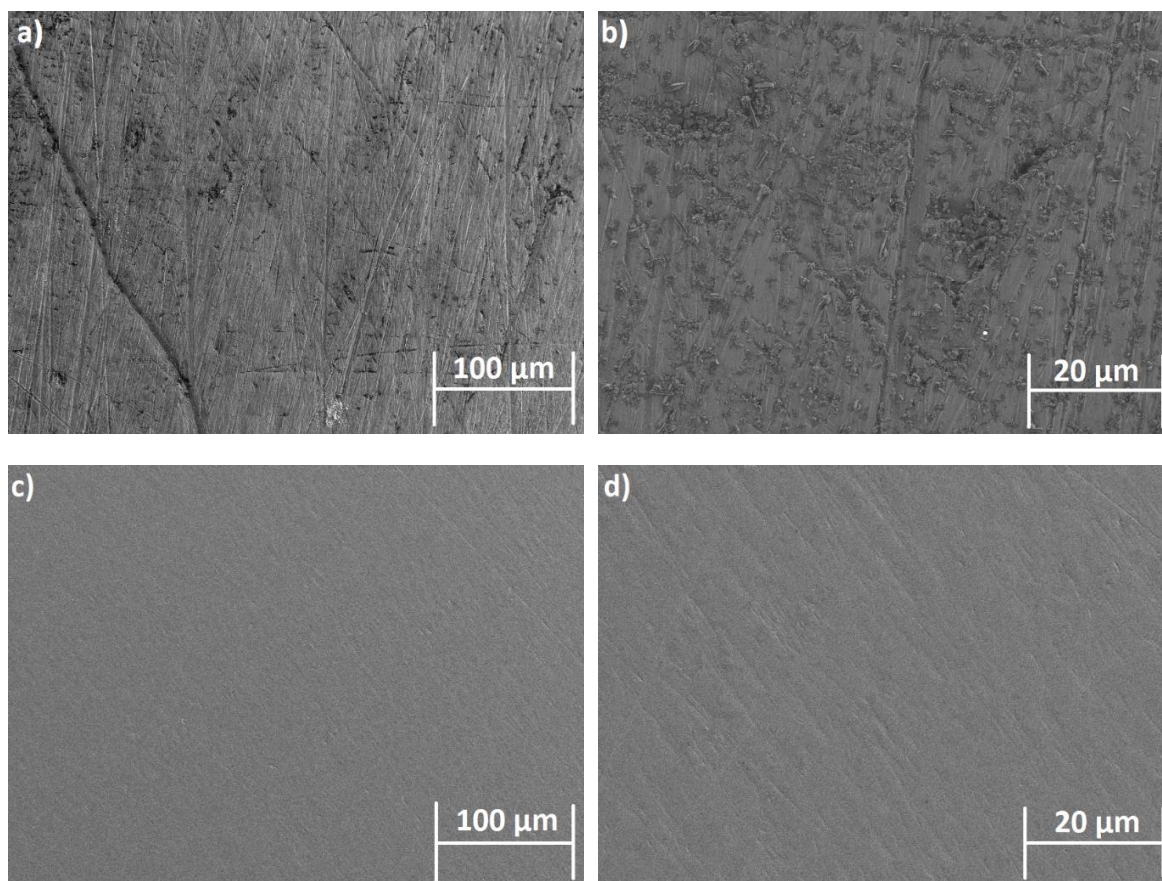

9 **Figure S2.** SEM images of titanium surface (a,b) before and (c,d) after surface treatment in different  
 10 magnifications.

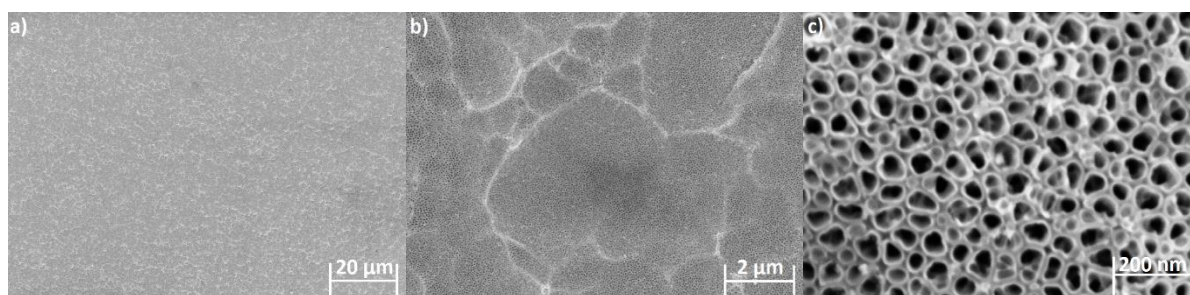

11 **Figure S3.** SEM images of porous titanium after anodization in different magnifications, the average  
 12 diameter of the pores (tubes) is 100 nm.  
 13



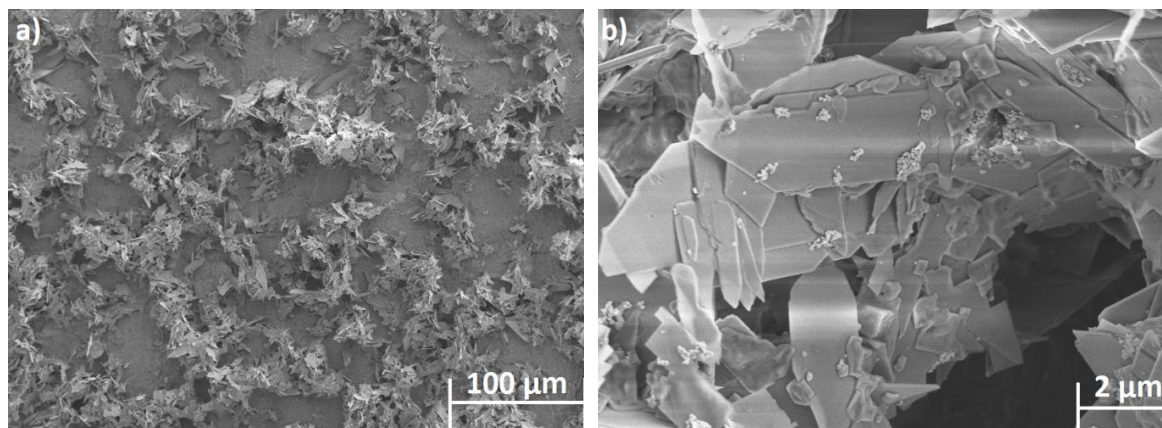

14 **Figure S4.** SEM images of HA with Re:IF-MoS<sub>2</sub> nanoparticles coating obtained from solution B (3 h  
15 deposition time) on porous titanium substrate in different magnifications.

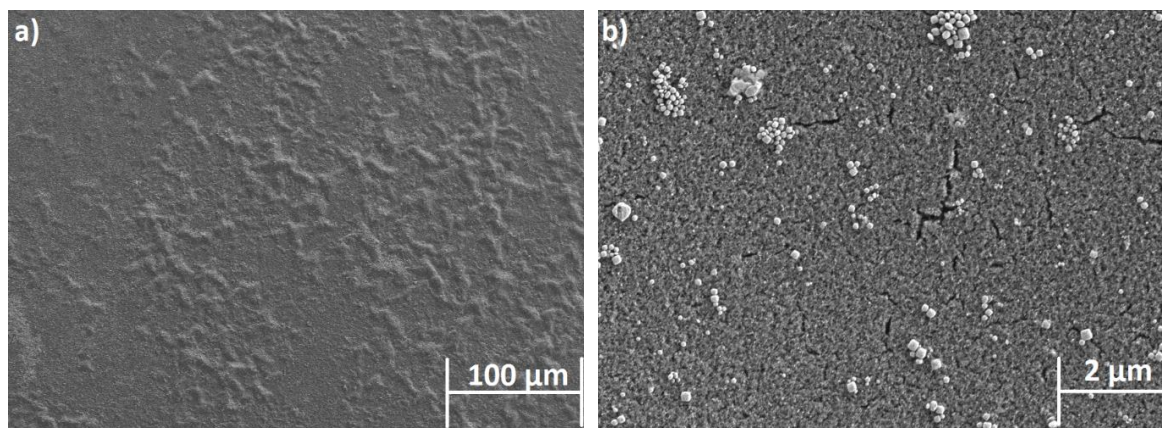

16 **Figure S5.** SEM pictures of HA with Re:IF-MoS<sub>2</sub> nanoparticles coating obtained from solution C (1 h  
17 deposition time) on porous titanium substrate in different magnifications.

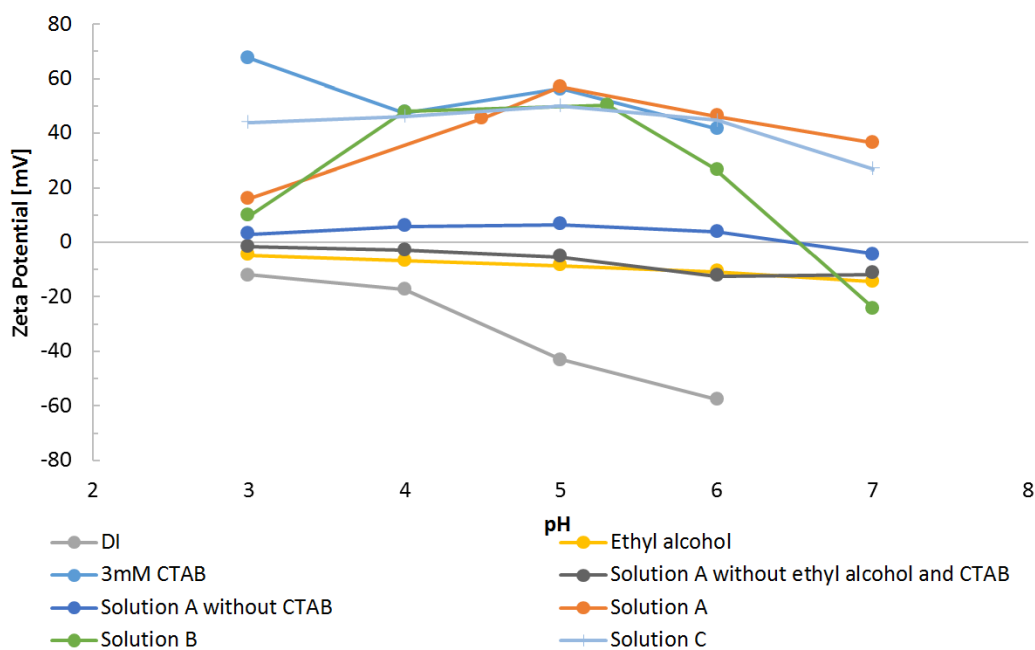

18 **Figure S6.** Zeta-potential vs pH for Re:IF-MoS<sub>2</sub> nanoparticles in different solutions.  
19
